# Supplementary material for: Gemcitabine-Incorporated G-Quadruplex Aptamer for Targeted Drug Delivery into Pancreas Cancer
Source: PubMed Central journal article supplement — Mol Ther Nucleic Acids. 2018 Jun 15;12:543–53. doi: 10.1016/j.omtn.2018.06.003 (PMC6077122; doi:10.1016/j.omtn.2018.06.003), 2018-06-15
Supplement: mmc1.pdf [file mmc1.pdf]

**OMTN, Volume 12**

**Supplemental Information**

**Gemcitabine-Incorporated G-Quadruplex**

**Aptamer for Targeted Drug Delivery**

**into Pancreas Cancer**

**Jun Young Park, Ye Lim Cho, Ju Ri Chae, Sung Hwan Moon, Won Gil Cho, Yun Jung Choi, Soo Jin Lee, and Won Jun Kang**

Supplemental figures

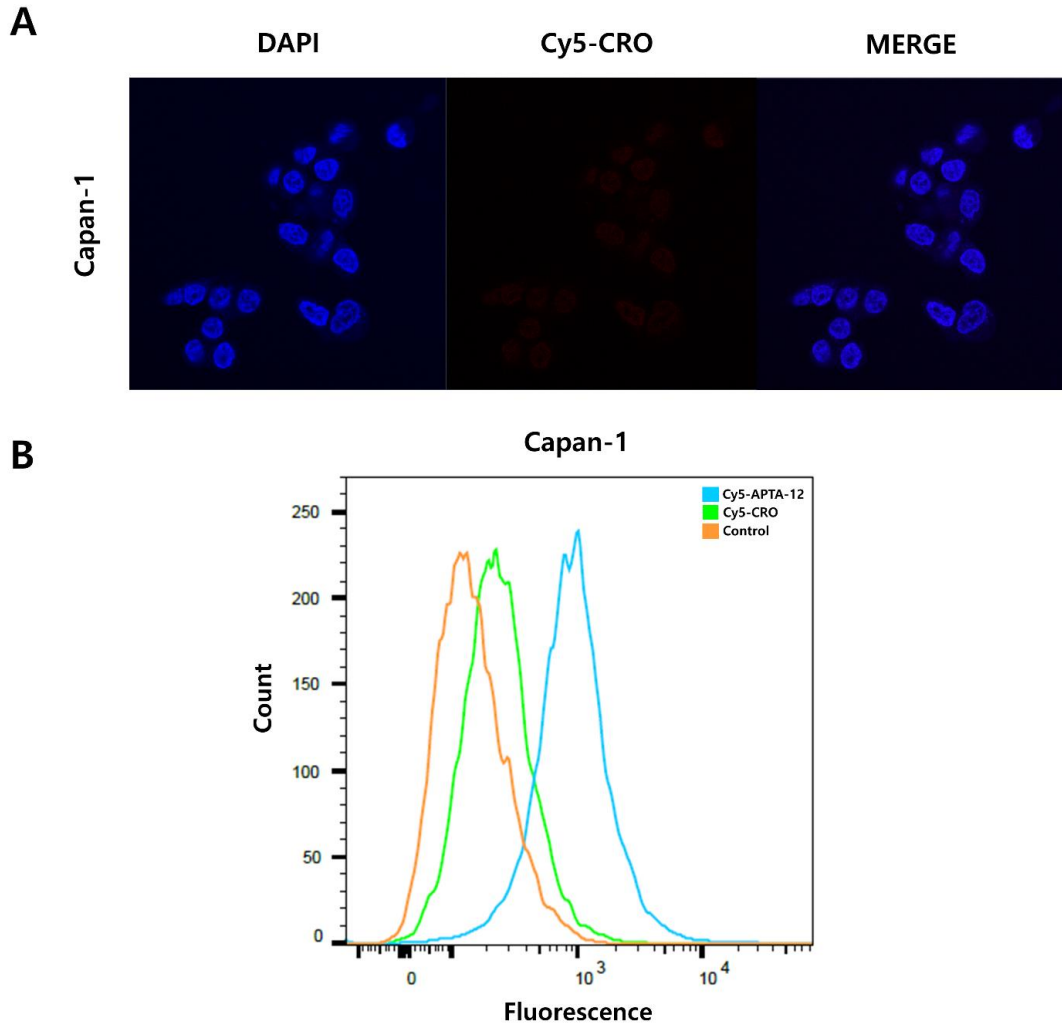

**Figure S1. *In vitro* characterization of Cytosine-rich oligonucleotide on nucleolin positive Capan-1 cells (A)** Confocal microscopy image of Capan-1 cells incubated with Cy5-labeled CRO. Cells nuclei were stained with DAPI (blue). **(B)** Evaluation of the binding affinity of APTA-12 and CRO aptamers by flow cytometry in Capan-1 cells.

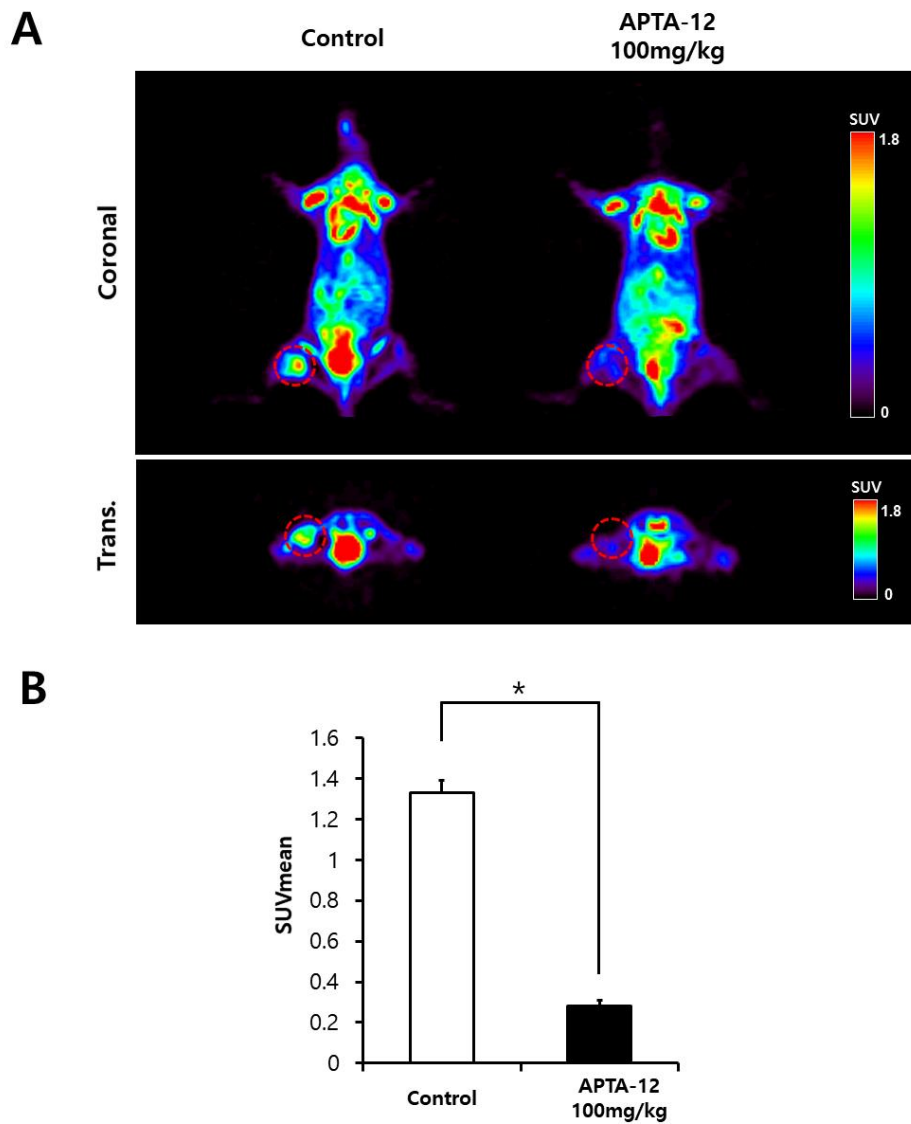

**Figure S2. Monitoring of the therapeutic effect of APTA-12.** (A) Quantitative PET imaging of  $^{18}\text{F}$ -FDG in Capan-1 tumor-bearing mice at the end of treatment with DPBS (control, left part) or APTA-12 aptamer (right part). The red dotted circles indicate Capan-1 tumors.  $^{18}\text{F}$ -FDG uptake is expressed by  $\text{SUV}_{\text{mean}}$ . (B) The tumors in the APTA-12 treated mice show a significantly lower  $^{18}\text{F}$ -FDG uptake than DPBS-treated mice in the PET image.  $*P < 0.001$  compared to the DPBS-treated group.
